# Supplementary material for: Cytogenomic Profile of Uterine Leiomyoma: In Vivo vs. In Vitro Comparison
Source: MDPI journal article supplement (doi:10.3390/biomedicines9121777), 2021-11-26
Supplement: s1 [file s1]

**Table S2.** Relative telomere length in uterine leiomyoma (UL) and paired myometrium (Myo) cultured samples from patients with normal (13, 14, 15, 16, 17) and abnormal (5, 6) tumour karyotype.

| Tumour karyotype                                                   | Abnormal |       |       |       | Normal |       |       |       |       |       |       |       |       |       |
|--------------------------------------------------------------------|----------|-------|-------|-------|--------|-------|-------|-------|-------|-------|-------|-------|-------|-------|
| Case                                                               | 5        |       | 6     |       | 13     |       | 14    |       | 15    |       | 16    |       | 17    |       |
| Sample                                                             | UL       | Myo   | UL    | Myo   | UL     | Myo   | UL    | Myo   | UL    | Myo   | UL    | Myo   | UL    | Myo   |
| Relative telomere length of both chromosomes 13 on metaphase plate | 1.507    | 3.332 | 1.305 | 2.706 | 1.536  | 2.131 | 1.688 | 1.844 | 1.453 | 2.029 | 2.155 | 2.823 | 0.954 | 1.267 |
|                                                                    | 1.307    | 1.848 | 0.968 | 2.254 | 2.177  | 1.673 | 2.207 | 2.741 | 1.521 | 1.165 | 0.979 | 2.317 | 0.729 | 1.278 |
|                                                                    | 1.978    | 3.617 | 1.936 | 3.613 | 1.964  | 2.392 | 1.190 | 2.128 | 1.469 | 3.002 | 0.963 | 2.794 | 0.753 | 1.814 |
|                                                                    | 1.840    | 2.717 | 1.000 | 2.547 | 2.569  | 2.263 | 2.007 | 2.627 | 1.268 | 2.801 | 0.865 | 2.056 | 0.675 | 1.760 |
|                                                                    | 1.340    | 2.717 | 1.046 | 2.737 | 1.903  | 1.590 | 1.237 | 1.935 | 2.218 | 1.401 | 0.991 | 2.545 | 1.246 | 1.310 |
|                                                                    | 1.461    | 3.057 | 1.139 | 1.791 | 1.695  | 2.399 | 1.342 | 1.843 | 1.384 | 1.916 | 0.680 | 2.946 | 0.566 | 1.863 |
|                                                                    | 1.033    | 1.509 | 1.447 | 2.222 | 1.345  | 3.764 | 1.856 | 3.249 | 1.684 | 1.781 | 1.295 | 2.604 | 0.721 | 1.380 |
|                                                                    | 0.813    | 2.162 | 1.026 | 3.670 | 2.024  | 3.082 | 1.796 | 1.202 | 0.850 | 1.950 | 0.945 | 1.844 | 1.137 | 1.386 |
|                                                                    | 1.711    | 3.651 | 2.322 | 3.765 | 1.559  | 3.061 | 1.148 | 1.862 | 1.874 | 1.645 | 1.340 | 2.835 | 0.705 | 1.905 |
|                                                                    | 1.156    | 3.289 | 1.504 | 2.018 | 1.883  | 2.811 | 1.609 | 2.833 | 1.352 | 1.901 | 2.181 | 2.314 | 0.944 | 1.634 |
|                                                                    |          |       |       |       |        | 2.571 | 1.431 |       |       |       | 1.114 |       |       |       |
|                                                                    |          |       |       |       |        | 4.710 | 1.854 |       |       |       |       |       |       |       |
| Relative telomere length of the sample (mean value)                | 1.415    | 2.790 | 1.369 | 2.732 | 1.866  | 2.704 | 1.614 | 2.226 | 1.507 | 1.959 | 1.228 | 2.508 | 0.843 | 1.560 |
