# Supplementary material for: Cytogenomic Profile of Uterine Leiomyoma: In Vivo vs. In Vitro Comparison
Source: MDPI journal article supplement (doi:10.3390/biomedicines9121777), 2021-11-26
Supplement: s1 [file s1]

**Supplementary Table S1.** Whole chromosome (WCP or XCP), centromere- (CEP or SE), band- (MCB), arm- (pcp) or locus-specific (LSI) FISH probes used to identify chromosomes and chromosomal regions involved in the rearrangements (except probes listed in Materials and Methods, Table 1).

| Case | Probe                        | Chromosome localisation           | Manufacturer             |
|------|------------------------------|-----------------------------------|--------------------------|
| 2    | WCP6                         | Chr. 6                            | Applied Spectral Imaging |
|      | WCP10                        | Chr. 10                           | Applied Spectral Imaging |
|      | XCP16                        | Chr. 16                           | Metasystems              |
| 3    | WCP4                         | Chr. 4                            | Homemade                 |
|      | WCP9                         | Chr. 9                            | Applied Spectral Imaging |
|      | WCP10                        | Chr. 10                           | Homemade                 |
|      | WCP12                        | Chr. 12                           | Homemade                 |
|      | WCP22                        | Chr. 22                           | Homemade                 |
|      | WCPX                         | Chr. X                            | Applied Spectral Imaging |
|      | MCB7                         | Chr. 7                            | Homemade                 |
|      | MCB10                        | Chr. 10                           | Homemade                 |
| 4    | LSI ELN / LSI D7S486, D7S522 | 7q11.23, 7q31.1-31.3              | Abbott Molecular         |
|      | LSI: RP11-90N9               | 7q21.11                           | Homemade                 |
|      | LSI: RP11-313N23             | 7q21.2                            | Homemade                 |
| 5    | WCP12                        | Chr. 12                           | Homemade                 |
|      | WCP14                        | Chr. 14                           | Homemade                 |
|      | LSI ELN / LSI D7S486, D7S522 | 7q11.23, 7q31                     | Abbott Molecular         |
|      | MCB7                         | Chr. 7                            | Homemade                 |
|      | WCP1                         | Chr. 1                            | Applied Spectral Imaging |
| 6    | LSI 1p36                     | 1pTEL, 1p36, 1q25                 | Abbott Molecular         |
|      | MCB1                         | Chr. 1                            | Homemade                 |
|      | MCB10                        | Chr. 10                           | Homemade                 |
|      | pcp1p                        | 1p                                | Homemade                 |
|      | pcp10q                       | 10q                               | Homemade                 |
|      | WCP1                         | Chr. 1                            | Applied Spectral Imaging |
| 7    | WCP2                         | Chr. 2                            | Kreatech                 |
|      | WCP3                         | Chr. 3                            | Applied Spectral Imaging |
|      | WCP9                         | Chr. 9                            | Applied Spectral Imaging |
|      | WCP16                        | Chr. 16                           | Applied Spectral Imaging |
|      | WCP17                        | Chr. 17                           | Applied Spectral Imaging |
|      | LSI 1p36                     | 1pTEL, 1p36, 1q25                 | Abbott Molecular         |
|      | LSI N-MYC                    | 2p24                              | Abbott Molecular         |
|      | CEP17 (D17Z1)                | 17p11.1-q11.1 Alpha Satellite DNA | Abbott Molecular         |
|      | LSI: TelVision 17q           | 17qTEL (D17S928)                  | Abbott Molecular         |
|      | LSI: TelVision 3p and 3q     | 3pTEL (D3S4559), 3qTEL (D3S4560)  | Abbott Molecular         |
|      | LSI: TelVision 16p and 16q   | 16pTEL, 16qTEL                    | Abbott Molecular         |
| 8    | WCP 1                        | Chr. 1                            | Applied Spectral Imaging |
|      | WCP 3                        | Chr. 3                            | Applied Spectral Imaging |
|      | WCP 13                       | Chr. 13                           | Abbott Molecular         |
|      | CEP 1 (D1Z5)                 | 1p11.1-q11.1 Alpha Satellite DNA  | Abbott Molecular         |

|                                                                      |                                     |                          |
|----------------------------------------------------------------------|-------------------------------------|--------------------------|
| CEP 3 (D3Z1)                                                         | 3p11.1-q11.1 Alpha<br>Satellite DNA | Abbott Molecular         |
| SE13/21                                                              | 13p11.1-q11.1,<br>21p11.1-q11.1     | Kreatech                 |
| LSI 1p36                                                             | 1pTEL, 1p36, 1q25                   | Abbott Molecular         |
| WCP2                                                                 | Chr. 2                              | Kreatech                 |
| WCP6                                                                 | Chr. 6                              | Applied Spectral Imaging |
| WCP9                                                                 | Chr. 9                              | Applied Spectral Imaging |
| WCP11                                                                | Chr. 11                             | Applied Spectral Imaging |
| WCP14                                                                | Chr. 14                             | Applied Spectral Imaging |
| XCP16                                                                | Chr. 16                             | Metasystems              |
| WCPX                                                                 | Chr. X                              | Applied Spectral Imaging |
| pcp2q                                                                | 2q                                  | Homemade                 |
| pcp6p                                                                | 6p                                  | Homemade                 |
| pcp6q                                                                | 6q                                  | Homemade                 |
| pcp11p                                                               | 11p                                 | Homemade                 |
| MCB2                                                                 | Chr. 2                              | Homemade                 |
| MCB6                                                                 | Chr. 6                              | Homemade                 |
| MCB11                                                                | Chr. 11                             | Homemade                 |
| MCB14                                                                | Chr. 14                             | Homemade                 |
| MCBX                                                                 | Chr. X                              | Homemade                 |
| LSI/CEP/pcp:<br>Subcentromere-oriented<br>mix 9                      | Chr. 9                              | Homemade                 |
| LSI: ZytoLight® SPEC<br>EML4 Dual Color Break<br>Apart Probe         | 2p21                                | ZytoVision GmbH          |
| LSI: ZytoLight® SPEC<br>FOXO1/PAX3 Dual Color<br>Single Fusion Probe | 2q36.1, 13q14.11                    | ZytoVision GmbH          |
| LSI: RP11-130P22                                                     | 2p21                                | Homemade                 |
| LSI: RP11-134D9                                                      | 2p16.3                              | Homemade                 |
| LSI: RP11-355B11                                                     | 2p15                                | Homemade                 |
| LSI: RP11-576F1                                                      | 2p21                                | Homemade                 |
| LSI: RP11-438B23                                                     | 9p21                                | Homemade                 |
| LSI: RP11-503K16                                                     | 9p22.1                              | Homemade                 |
| LSI: RP11-513M16                                                     | 9p22.1                              | Homemade                 |
| LSI: RP11-6K5                                                        | 11p15                               | Homemade                 |
| LSI: RP11-140J4                                                      | 11p15                               | Homemade                 |
